# Supplementary material
Source: publisher figshare collection journal article supplement (https://karger.figshare.com/ndownloader/files/14579561)
Supplement: Supplementary file 1 [file 14579561]

Table 1: Classification criteria for levels of evidence

| Levels of evidence                             | Criteria                                                                                                                                                                                                                                                                                          |
|------------------------------------------------|---------------------------------------------------------------------------------------------------------------------------------------------------------------------------------------------------------------------------------------------------------------------------------------------------|
| A (Strong Scientific Evidence)                 | Statistically significant evidence of benefit from >2 properly randomized trials (RCTs), OR evidence from one properly conducted RCT AND one properly conducted meta-analysis.                                                                                                                    |
| B (Good Scientific Evidence)                   | Statistically significant evidence of benefit from 1-2 properly randomized trials, OR evidence of benefit from >1 properly conducted meta-analysis OR evidence of benefit from >1 cohort/case-control/non-randomized trials.                                                                      |
| C (Unclear or conflicting scientific evidence) | Evidence of benefit from >1 small RCT(s) without adequate size, power, statistical significance, or quality of design by objective criteria, OR conflicting evidence from multiple RCTs without a clear majority of the properly conducted trials showing evidence of benefit or ineffectiveness. |
| D (Fair Negative Scientific Evidence)          | Statistically significant negative evidence (i.e., lack of evidence of benefit) from cohort/case control/ non-randomized trials.                                                                                                                                                                  |
| E (Strong Negative Scientific Evidence)        | Statistically significant negative evidence (i.e. lack of evidence of benefit) from >1 properly randomized adequately powered trial(s) of high-quality design by objective criteria.                                                                                                              |
| Lack of Evidence                               | Unable to evaluate efficacy due to lack of adequate available data. This is not equivalent to negative evidence.                                                                                                                                                                                  |

Table 2: Classification of clinical studies

| Level of evidence | Study design                                                                                                                            |
|-------------------|-----------------------------------------------------------------------------------------------------------------------------------------|
| 1a                | Double-blind randomized clinical trials                                                                                                 |
| 1b                | Non-blinded randomized clinical trials, including those comparing homeopathy with conventional therapy as control (equivalence studies) |
| 2                 | Non-randomized controlled clinical trials, including those comparing homeopathy with conventional therapy (equivalence studies)         |
| 3                 | Prospective observational studies, without control group                                                                                |
| 4                 | Retrospective studies of case-series                                                                                                    |

Table 3: Classification of publications according to type

| Class | Publication type                                                   |
|-------|--------------------------------------------------------------------|
| 1a    | Mainstream medicine indexed , peer-reviewed, journal               |
| 1b    | Complementary/alternative medicine indexed, peer reviewed, journal |
| 2     | Non-indexed journal                                                |
| 3     | Book or book chapter, conference proceedings                       |

Table 4: Details of controlled trials on bronchial asthma

| References                                | Study and publication type | Aim                                                  | Population and setting                                  | Inclusion and exclusion criteria                                                                                                                                                                     | Design                                                                                                                                                                            | Intervention                                                                                                                  | Control                                                                                                | No. of patients – attrition – ITT/PP | Key results                                                                                                                                                                                                                                     | Funding – conflict of interest |
|-------------------------------------------|----------------------------|------------------------------------------------------|---------------------------------------------------------|------------------------------------------------------------------------------------------------------------------------------------------------------------------------------------------------------|-----------------------------------------------------------------------------------------------------------------------------------------------------------------------------------|-------------------------------------------------------------------------------------------------------------------------------|--------------------------------------------------------------------------------------------------------|--------------------------------------|-------------------------------------------------------------------------------------------------------------------------------------------------------------------------------------------------------------------------------------------------|--------------------------------|
| Campbell JH, et al, 1990 <sup>[26]</sup>  | 1a-1a                      | Efficacy of HIT                                      | Adults; US                                              | Not detailed                                                                                                                                                                                         | Double blind, randomized, parallel arm, placebo controlled                                                                                                                        | Usual care plus allergen 30c (n=14)                                                                                           | Usual care plus placebo (n=14)                                                                         | 28-?-?                               | Less intensity (VAS) of symptoms in verum than placebo – significant difference of 93.3 mm; no difference in spirometry                                                                                                                         | Not stated                     |
| Boucinhas JC, et al, 1990 <sup>[27]</sup> | 2-2                        | Efficacy of Lung histamine C5                        | Children; France                                        | History of at least 3 asthmatic crises                                                                                                                                                               | Open, non-randomized, controlled                                                                                                                                                  | Non-individualized standardized Lung histamine C5 (n=109)                                                                     | No treatment (n=26)                                                                                    | 135-14.1%-PP (n=116)                 | Decrease in number of asthmatic crises in verum (0.38±0.59 vs. 1.54±1.01)                                                                                                                                                                       | Not stated                     |
| Reilly D, et al, 1994 <sup>[28]</sup>     | 1a-1a                      | Efficacy of additive HIT to conventional care        | Adults; Asthma specialist outpatient clinic in Scotland | Allergic asthma, mostly sensitivity to house-dust mite, >15% improvement of FEV1 with bronchodilators, >1 year history, atopy (reactive to inhaled allergens and positive skin tests), age >16 years | Double blind randomized parallel arm placebo controlled Schedule: 4 weeks placebo run-in pre-randomization on qualification period, 4 weeks treatment, 4 weeks optional follow-up | Lactose or sucrose globules impregnated with individual allergens in potency C30; 3 doses of globules within 24 hours (once). | Lactose or sucrose globules impregnated with diluents only; 3 doses of globules within 24 hours (once) | 28-14.3%-PP (n=24)                   | Significant difference found for severity of symptoms (VAS); it decreased 7.2±3.2 mm in verum but increased 7.8±3.0 mm in placebo (P=0.003); similar trend in lung function and bronchial reactivity; drop-outs or withdrawals: 2 in each group | Not stated                     |
| Freitas LAS, et al., 1995 <sup>[29]</sup> | 1a-1b                      | Efficacy of Blatta orientalis C6 in pediatric asthma | Children; Homeopathy outpatient clinic in Sao Paulo,    | At least 3 bronchospastic episodes with intervals of 3 months or less,                                                                                                                               | Double blind, randomized, parallel group,                                                                                                                                         | Non-individualized, standardized Blatta orientalis C6, 2 globules 3                                                           | Indistinguishable placebo, 2 globules 3 times per day for 6 months                                     | 86-19.8%-PP (n=69)                   | M 34, F 35; age range 1-12 yrs; no significant difference in score combining frequency (severity 7.55±7.83 in                                                                                                                                   | Not stated                     |

|                                              |      |                                                |                                         |                                                                                                                                                                                          |                                                                                    |                                                                                                                                                                                                                                                                  |                                                       |                                                                                                             |                                                                                                                                                                                                                                                                                                                  |            |
|----------------------------------------------|------|------------------------------------------------|-----------------------------------------|------------------------------------------------------------------------------------------------------------------------------------------------------------------------------------------|------------------------------------------------------------------------------------|------------------------------------------------------------------------------------------------------------------------------------------------------------------------------------------------------------------------------------------------------------------|-------------------------------------------------------|-------------------------------------------------------------------------------------------------------------|------------------------------------------------------------------------------------------------------------------------------------------------------------------------------------------------------------------------------------------------------------------------------------------------------------------|------------|
| Matusiewicz R, et al., 1995 <sup>[30]</sup>  | 1a-2 | Efficacy of additive Engystol N® to usual care | Brazil<br>Adults;<br>Polish<br>Hospital | or continuous wheeze for at least 3 months<br>Corticosteroid-dependent bronchial asthma, confirmed by history and spirometry; treated with Triamcinolone 4-8 mg daily for at least 5 yrs | placebo-controlled<br>Double blind, randomized, parallel group, placebo controlled | times per day for 6 months<br>1 ampoule Engystol N® (complex homeopathic remedy consisting of Vincetoxin D6/D10/D30, Sulfur D4/D10) , injected subcutaneously at intervals of 5 to 7 days; plus methylxanthines for mucolysis and tetracycline for exacerbations | 1 ampoule placebo in addition to mentioned usual care | 50 (unclear if this number refers to number of patients randomized , analysed or completing the study)-?-?  | verum and 9.02±8.63 in placebo), duration and intensity of bronchospastic episodes<br>Insufficient reporting, ‘clear difference’ reported in lung function, medication use, granulocyte function; drop-outs/ withdrawals not reported; mean PEFR change – verum: from 200 to 330 ml; placebo: from 210 to 190 ml | Not stated |
| Matusiewicz R, 1996 <sup>[31]</sup>          | 1a-2 | Efficacy of Traumeel S®                        | Adults;<br>Polish<br>Hospital           | Corticosteroid-dependent bronchial asthma, confirmed by history and spirometry; treated with Triamcinolone 4-8 mg daily for at least 5 yrs                                               | Double blind, non-randomized, parallel group, placebo controlled                   | Weekly subcutaneous injection of Traumeel S® (a combination of 14 homeopathic remedies) or placebo for 20 weeks                                                                                                                                                  | Weekly subcutaneous injection of placebo for 20 weeks | 103 (unclear if this number refers to number of patients randomized , analysed or completing the study)-?-? | No difference between groups for lung function but lower use of corticosteroids in the treatment group; mean PEFR levels were 302 ml in verum and 290 ml in placebo                                                                                                                                              | Not stated |
| Lara-Marquez ML, et al, 1997 <sup>[32]</sup> | 1a-3 | Efficacy of individualized homeopathy          | Adults;<br>Venezuela                    | Not detailed                                                                                                                                                                             | Double blind, randomized, parallel arm, placebo controlled                         | Individualized homeopathy                                                                                                                                                                                                                                        | Placebo                                               | 19 (unclear if this number refers to number of patients randomized , analysed or                            | Verum better than placebo symptomatically; significant changes in spirometry and immunological markers                                                                                                                                                                                                           | Not stated |

|                                                |      |                                                                 |                         |                                                                                                                                                                                                                                                                               |                                                                                                                                                            |                                                        |                      |                                                                                                            |                                                                                                                                                                                                                                                  |            |
|------------------------------------------------|------|-----------------------------------------------------------------|-------------------------|-------------------------------------------------------------------------------------------------------------------------------------------------------------------------------------------------------------------------------------------------------------------------------|------------------------------------------------------------------------------------------------------------------------------------------------------------|--------------------------------------------------------|----------------------|------------------------------------------------------------------------------------------------------------|--------------------------------------------------------------------------------------------------------------------------------------------------------------------------------------------------------------------------------------------------|------------|
| Jansen GRHJ, et al, 1997 <sup>[33]</sup>       | 1a-3 | Efficacy of additive individualized homeopathy to standard care | Adults; the Netherlands | Inclusion: Age between 6-17 or 18-55 yrs, ≥15/70 points on 7-item asthma severity scale, written consent; Exclusion: homeopathic treatment with ≥ 30C within 2 months, disorders similar to asthma, severe concomitant disorders, systemic immune-suppressive within 6 months | Double blind, randomized, parallel arm, placebo controlled in the context of usual care; 3 weeks baseline, followed by 3 medication cycles of 7 weeks each | Individualized homeopathy; potency 200C (standardized) | Placebo              | completing the study)-?-?<br>58 (stage I and II) and 11 (stage III)-?-?                                    | Study was ongoing – stages I-III completed, stage IV to be initiated; results not disclosed.<br>Outcome measures chosen were changes in severity of asthmatic complaints, peak flow, consumption of anti-asthmatic drugs, and general well being | Not stated |
| Riveron-Garrote M, et al, 1998 <sup>[34]</sup> | 1a-2 | Efficacy of individualized homeopathy                           | Adults; Mexico          | Not detailed                                                                                                                                                                                                                                                                  | Double blind, randomized, parallel arm, placebo controlled                                                                                                 | Individualized homeopathy                              | Placebo              | 63 (unclear if this number refers to number of patients randomized , analysed or completing the study)-?-? | Number of asthma attacks (4 m) was less in verum than in control (p<0.05)                                                                                                                                                                        | Not stated |
| Matusiewicz R, et al., 1999 <sup>[35]</sup>    | 1a-2 | Efficacy of additive                                            | Adults; Polish          | Chronic bronchial                                                                                                                                                                                                                                                             | Double blind,                                                                                                                                              | 1 ampoule of Asthma H® (a                              | 1 ampoule of placebo | 84 (unclear if this                                                                                        | Insufficient reporting; significant effect in                                                                                                                                                                                                    | Not stated |

|                                       |       | Asthma H® to usual care         | Hospital                                             | asthma based on history, spirometry, physical examination and medication use; severity unclear; Triamcinolone use 4-8 mg daily for at least 5 yrs                                                                                                                                                                                                        | randomized, parallel arm, placebo controlled                                                                                    | complex remedy consisting of 14 homeopathic potencies of D3, D4, D5 and D6) injected subcutaneously at intervals of 5 to 7 days | injected subcutaneous ly at intervals of 5 to 7 days  | number refers to number of patients randomized , analysed or completing the study) plus 20 healthy controls-?-? | reduction of medication use, immune functioning, global rating and number of infections                                                                                                                                                                                                                                                             |                                                                                                                                                                          |
|---------------------------------------|-------|---------------------------------|------------------------------------------------------|----------------------------------------------------------------------------------------------------------------------------------------------------------------------------------------------------------------------------------------------------------------------------------------------------------------------------------------------------------|---------------------------------------------------------------------------------------------------------------------------------|---------------------------------------------------------------------------------------------------------------------------------|-------------------------------------------------------|-----------------------------------------------------------------------------------------------------------------|-----------------------------------------------------------------------------------------------------------------------------------------------------------------------------------------------------------------------------------------------------------------------------------------------------------------------------------------------------|--------------------------------------------------------------------------------------------------------------------------------------------------------------------------|
| Lewith G, et al, 2002 <sup>[36]</sup> | 1a-1a | Efficacy of house dust mite 30c | Adults; 38 general practices in Hampshire and Dorset | Inclusion: mild to severe asthma; 15% improvement in lung function after bronchodilator , plus at least two of the following: asthma symptom diary score>1; variation in PEF>15% on at least 7/14 baseline days; inhaled Salbutamol on at least 7/14 baseline days; positive skin prick test to house dust mite with response greater than aeroallergens | Double blind, randomized, parallel arm, placebo controlled. Study schedule: 4 weeks run-in, 1 day treatment, 16 weeks follow-up | HIT house dust mite 30C; 3 doses orally in 24 hours                                                                             | Indistinguishable placebo; 3 doses orally in 24 hours | 242-16.5%-PP (n=202) .                                                                                          | Mean age: verum 38.2, placebo 37.9; no difference found in lung function, medication use, subjective symptoms; drop-outs/ withdrawals: verum 21, control 19. Mean FEV1 improvement was 0.14 l/sec in verum and 0.41 l/sec in placebo. Significant interactions reported between treatment group and week of assessment. No adverse events reported. | Funding from Smith's Charity, NHS Executive South and West Research and Development Directorate, Boiron, and Maurice Laing Foundation; conflict of interest none stated. |

|                                      |      |                                    |                 |                                                                                                                                                                                                                                                                                                                            |                                                            |                                                                                                                                                                                  |         |                                                                                                             |                                                                                           |                                    |
|--------------------------------------|------|------------------------------------|-----------------|----------------------------------------------------------------------------------------------------------------------------------------------------------------------------------------------------------------------------------------------------------------------------------------------------------------------------|------------------------------------------------------------|----------------------------------------------------------------------------------------------------------------------------------------------------------------------------------|---------|-------------------------------------------------------------------------------------------------------------|-------------------------------------------------------------------------------------------|------------------------------------|
|                                      |      |                                    |                 | tested.<br>Exclusion: no impairment in QoL during 14 day run-in period; non-completion of study diary >4/14 days; recent participation in another drug trial (<30 days); any previous homeopathic prescribing; pregnancy or lactation; RTI <3 weeks; suspicion of poor compliance; change in concurrent medication<2 weeks |                                                            |                                                                                                                                                                                  |         |                                                                                                             |                                                                                           |                                    |
| Suri JC, et al, 2002 <sup>[37]</sup> | 1a-2 | Efficacy of Spenglersan Kolloid K® | Adults; Germany | Not detailed                                                                                                                                                                                                                                                                                                               | Double blind, randomized, parallel arm, placebo controlled | Homeopathy complex: Spenglersan Kolloid K® consisting of antigens and antitoxins from Staphylococcus aureus subsp., Aureus D9; Streptococcus pneumoniae subsp. Pneuminae Dil. D9 | Placebo | 66 (unclear if this number refers to number of patients randomized , analysed or completing the study)- ?-? | Patients rated symptom improvement in 23/33 homeopathy patients and 8/33 placebo patients | Funding: Spenglersan GmbH, Germany |

|                                       |       |                                                              |                                                                              |                                                                                                                                                                                                                                                |                                                                                                |                                                                                                                                                                                                  |                                                         |                                                                                                          |                                                                                                                                                                                                                                                                                                                                                                                                                                             |                                                                                                                                                    |
|---------------------------------------|-------|--------------------------------------------------------------|------------------------------------------------------------------------------|------------------------------------------------------------------------------------------------------------------------------------------------------------------------------------------------------------------------------------------------|------------------------------------------------------------------------------------------------|--------------------------------------------------------------------------------------------------------------------------------------------------------------------------------------------------|---------------------------------------------------------|----------------------------------------------------------------------------------------------------------|---------------------------------------------------------------------------------------------------------------------------------------------------------------------------------------------------------------------------------------------------------------------------------------------------------------------------------------------------------------------------------------------------------------------------------------------|----------------------------------------------------------------------------------------------------------------------------------------------------|
| White A, et al, 2003 <sup>[38]</sup>  | 1a-1a | Efficacy of additive individualized homeopathy to usual care | Children; primary care (3 non-medically qualified homeopaths' practices), UK | Inclusion: GPs diagnosis and prescription for either $\beta$ -agonist or corticosteroid inhaler in previous 3 months.<br>Exclusion: oral corticosteroids in last 12 months, previous consultation with homeopath, suspicion of poor compliance | Double blind, randomized, parallel arm, placebo controlled                                     | Any number of individualised homeopathy prescriptions. Up to 6 consultations (plus telephone consultations if required) throughout the year. Use of adjunctive therapies allowed by practitioner | Placebo with adjunctive therapies                       | 93-16.1%-PP (n=78)                                                                                       | Age 5-15 years; 46% female. Comparable baseline characteristics. No significant difference in lung function at 52 weeks and quality of life; starting lung function not much different from healthy individuals (PEF 100.4 and 96.9% pred.); so unclear how much change could occur and doubt over whether the quality of life measure was sensitive enough to change. 13 adverse events (none serious) reported in verum and 10 in placebo | The Prince of Wales's Foundation for Integrated Health, London; Ainsworth's Pharmacy, London; Glaxo SmithKline; conflict of interest: none stated. |
| Delzoppo G, 2004 <sup>[39]</sup>      | 1b-2  | Efficacy of anti-homotoxic therapy in asthma                 | Adults; Italy                                                                | Not detailed                                                                                                                                                                                                                                   | Open, randomized, parallel arm, active controlled (equivalence trial)                          | Antihomotoxic therapy: Arnica heel®; Drosera-Homaccord®; Tartephedreel®; Cuprum-Heel®; Belladonna-Homaccord®                                                                                     | Conventional therapeutic strategy (e.g. Beclomethasone) | 30 (unclear if this number refers to number of patients randomized, analysed or completing the study)-?? | Comparable results in both groups                                                                                                                                                                                                                                                                                                                                                                                                           | Funding: Heel                                                                                                                                      |
| Mayra RG, et al, 2005 <sup>[40]</sup> | 2-2   | Effectiveness of a homeopathic complex Biomodulin T          | Infants; Cuba                                                                | 83 infants with recurrent respiratory infections, 51 males and 32 females; no further details                                                                                                                                                  | Cross-sectional, randomized epidemiological study; 3 parallel arms – A (Biomodulin T; n=28), B | Biomodulin T®                                                                                                                                                                                    | Usual care                                              | 83 (unclear if this number refers to number of patients randomized, analysed or                          | Complete leukogram, global eosinophil count and thymic ultrasound showed better values for groups A and B, not in children belonging to group C                                                                                                                                                                                                                                                                                             | Not stated                                                                                                                                         |

|                                          |       |                                                                 |                                                                                            |                                                                                                                                                                                                           |                                                    |                                                   |                    |                    |                                                                                           |                                                                             |
|------------------------------------------|-------|-----------------------------------------------------------------|--------------------------------------------------------------------------------------------|-----------------------------------------------------------------------------------------------------------------------------------------------------------------------------------------------------------|----------------------------------------------------|---------------------------------------------------|--------------------|--------------------|-------------------------------------------------------------------------------------------|-----------------------------------------------------------------------------|
| Thompson EA, et al, 2011 <sup>[41]</sup> | 1b-1b | Efficacy of additive individualized homeopathy to standard care | Children; Bristol Royal Children Hospital (BRHC) and Southmead Hospital (SMH), Bristol, UK | Inclusion: children aged 7-14 years, seen in a secondary care respiratory clinic<br>Exclusion: children who were presently using homeopathy, who were too unwell to take part or refused informed consent | (Biomodulin T plus IH; n=28), and C (std. therapy) | Individualized homeopathy plus standard treatment | Standard treatment | 39-10.3%-PP (n=35) | Poor asthma control in both groups; no additional benefit either medically or financially | Avon Primary Care Research Collaborative; conflict of interest: none stated |
|------------------------------------------|-------|-----------------------------------------------------------------|--------------------------------------------------------------------------------------------|-----------------------------------------------------------------------------------------------------------------------------------------------------------------------------------------------------------|----------------------------------------------------|---------------------------------------------------|--------------------|--------------------|-------------------------------------------------------------------------------------------|-----------------------------------------------------------------------------|

“?”: Data not available

Table 5: Details of excluded non-controlled trials on bronchial asthma

| References                               | Study and publication type | Aim                                                   | Population and setting                   | Inclusion and exclusion criteria | Design                                            | Intervention                                                                                                                  | No. of patients – attrition – ITT/PP                                                                                                                   | Key results                                                                              | Funding – conflict of interest                          |
|------------------------------------------|----------------------------|-------------------------------------------------------|------------------------------------------|----------------------------------|---------------------------------------------------|-------------------------------------------------------------------------------------------------------------------------------|--------------------------------------------------------------------------------------------------------------------------------------------------------|------------------------------------------------------------------------------------------|---------------------------------------------------------|
| Anil RB, et al, 1982 <sup>[42]</sup>     | 3, 2                       | Role of Arsenicum iodatum in acute asthma             | Adults; CCRH Unit, Bombay, India         | Not detailed                     | Open, observational, non-randomized, uncontrolled | Homeopathic Arsenicum iodatum and Tuberculinum in different strategies                                                        | 115 (unclear if this number refers to number of patients randomized, analysed or completing the study)-?-?                                             | Significant improvement 82.6%, moderate 8.7%, mild 8.7%                                  | Study funded by CCRH; conflict of interest: none stated |
| Anil RB, et al, 1988 <sup>[43]</sup>     | 3, 2                       | Role of specific medicines in asthma                  | Adults; CCRH Unit, Bombay, India         | Not detailed                     | Open, observational, non-randomized, uncontrolled | Homeopathic Arsenicum album and iodatum (N=96), Kali carbonicum (N=60), and Natrum sulphuricum (N=51) in different strategies | 207 (unclear if this number refers to number of patients randomized, analysed or completing the study)-?-?                                             | No details; symptomatology of prescribed medicines were verified, proving symptoms added | Study funded by CCRH; conflict of interest: none stated |
| Sachdeva OP, et al, 1988 <sup>[44]</sup> | 3, 2                       | Role of Arsenicum album in asthma                     | Adults; CCRH Unit, Bombay, India         | Not detailed                     | Open, observational, non-randomized, uncontrolled | Homeopathic Arsenicum album in different potencies                                                                            | 106 (unclear if this number refers to number of patients randomized, analysed or completing the study)-?-?                                             | Significant improvement in long standing cases; verified symptoms enlisted               | Study funded by CCRH; conflict of interest: none stated |
| Mosquera PMF, 1990 <sup>[45]</sup>       | 4, 3                       | Role of individualized homeopathy in pediatric asthma | Children; Mexico                         | Not detailed                     | Open, observational, non-randomized, uncontrolled | Individualized homeopathic medicines in different potencies                                                                   | 120 (unclear if this number refers to number of patients randomized, analysed or completing the study)-?-?                                             | Improvement in general assessment in most cases                                          | Not stated                                              |
| Castellsagu API, 1992 <sup>[46]</sup>    | 4, 1b                      | Role of individualized homeopathy in asthma           | Adults (n=12) and children (n=14); Italy | Not detailed                     | Open, observational, non-randomized, uncontrolled | Individualized homeopathic medicines in different potencies                                                                   | 26 (unclear if this number refers to number of patients randomized, analysed or completing the study)-?-?                                              | Improvement in global evaluation in most (57%) patients                                  | Not stated                                              |
| Singh H, 1992 <sup>[47]</sup>            | 3, 2                       | Role of individualized homeopathy in asthma           | Adults; CCRH unit, New Delhi             | Not detailed                     | Open, observational, non-randomized, uncontrolled | Individualized homeopathic medicines in different potencies                                                                   | 413 (extrinsic asthma 273, intrinsic asthma 140; unclear if this number refers to number of patients randomized, analysed or completing the study)-?-? | Improvement in majority of cases; further details not available                          | Study funded by CCRH; conflict of interest              |
| Eizayaga and                             | 4, 1b                      | Role of                                               | Adults;                                  | Inclusion:                       | Retrospective                                     | Individualized                                                                                                                | 62 (M 37, F25; age                                                                                                                                     | Significant                                                                              | Not stated                                              |

|                            |       |                                             |                                               |                                                                                                                                                                                                                                      |                                                   |                                                                                        |                                                                                                                                                      |                              |                                                         |
|----------------------------|-------|---------------------------------------------|-----------------------------------------------|--------------------------------------------------------------------------------------------------------------------------------------------------------------------------------------------------------------------------------------|---------------------------------------------------|----------------------------------------------------------------------------------------|------------------------------------------------------------------------------------------------------------------------------------------------------|------------------------------|---------------------------------------------------------|
| Eizayaga, 1996<br>[48]     |       | individualized homeopathy in asthma         | Private clinic, Argentina                     | typical regular asthmatic attacks, illness persisting for one year or longer, at least 8 months of homeopathic treatment<br>Exclusion: other diseases causing pulmonary obstruction, associated pathologies (heart disease, TB etc.) | , non-randomized, uncontrolled                    | homeopathic medicines in different potencies                                           | 19.5±14.2 yrs; unclear if this number refers to number of patients randomized, analysed or completing the study)-?-?                                 | decrease of symptom score    |                                                         |
| Sharma SR, 1999<br>[49]    | 3, 2  | Role of individualized homeopathy in asthma | Adults; CCRH unit, Shimla                     | Not detailed                                                                                                                                                                                                                         | Open, observational, non-randomized, uncontrolled | Individualized homeopathic medicines in different potencies                            | 331 (unclear if this number refers to number of patients randomized, analysed or completing the study)-?-?                                           | Improvement in 294 patients  | Study funded by CCRH; conflict of interest: none stated |
| Li AM, et al, 2003<br>[50] | 3, 1a | Role of additive HIT in asthma              | Children; Prince of Wales Hospital, Hong Kong | Stable asthma with no clinical indication for change in treatment, on any dose of inhaled corticosteroid and any other asthma medications; raised eNO level at the start of the study despite clinical stability;                    | Open, observational, non-randomized, uncontrolled | Additive HIT prepared from individual allergens – house dust mite, cat dander, or both | 12 (4 boys, median age 13.5 years, range 7–18; unclear if this number refers to number of patients randomized, analysed or completing the study)-?-? | No improvement in spirometry | Not stated                                              |

---

identifiable  
sensitivity to  
house dust  
mite or cat and  
HDM by  
history and  
skin prick test;  
no hospital  
admission or  
emergency  
department  
attendance for  
asthma in  
the previous 3  
months; no  
history of  
consumption  
of oral  
corticosteroid  
in the previous  
3 months; no  
homeopathic  
treatment  
within the  
previous 6  
months,  
allergen  
desensitization  
within the  
previous year,  
or HDM  
avoidance  
measures or  
removal of  
household  
pet to which  
the subject had  
a positive SPT  
in  
the previous 3  
months

---

|                                          |       |                                                                           |                                                                                    |                                                                                                                                                                                                                                  |                                                                 |                                                                            |                        |                                                                                                                                      |                                                         |
|------------------------------------------|-------|---------------------------------------------------------------------------|------------------------------------------------------------------------------------|----------------------------------------------------------------------------------------------------------------------------------------------------------------------------------------------------------------------------------|-----------------------------------------------------------------|----------------------------------------------------------------------------|------------------------|--------------------------------------------------------------------------------------------------------------------------------------|---------------------------------------------------------|
| Vichitra AK, et al, 2008 <sup>[51]</sup> | 3, 2  | Role of individualized homeopathy in asthma                               | Adults; 5 CCRH units, India                                                        | Not detailed                                                                                                                                                                                                                     | Open, observational, non-randomized, uncontrolled               | Individualized constitutional homeopathic medicines in different potencies | 2461-14.4%-PP (n=2107) | Cured: 52; improvement marked 856, moderate 444, mild 522; no improvement 233; 5 groups of remedies identified for varied purposes   | Study funded by CCRH; conflict of interest: none stated |
| Pinto S, 2012 <sup>[52]</sup>            | 3, 2  | Role of individualized homeopathy in asthma                               | Adults; India                                                                      | Not detailed                                                                                                                                                                                                                     | Open, observational, non-randomized, uncontrolled               | Individualized homeopathic medicines in different potencies                | 41-43.9%-PP (n=23)     | Relevant laboratory parameters improved significantly (p<0.01)                                                                       | Not stated                                              |
| Shafei HF, 2012 <sup>[53]</sup>          | 3, 1b | Role of additive individualized homeopathy to conventional care in asthma | Children aged 7-15 yrs; Homeopathic Clinic, National Research Centre, Cairo, Egypt | Exclusion: Children who had previously consulted a homeopath and received a homeopathic prescription, children unable to complete the necessary follow-up period or were suffering from systemic disease or congenital anomalies | Open, observational, longitudinal, non-randomized, uncontrolled | Individualized homeopathic medicines in different potencies                | 42-28.6%-PP (n=30)     | Significant improvement in frequency and severity of attacks, use of medication, night awakening and spirometry after 3 and 6 months | Not stated                                              |

‘?’: Data not available

Table 6: Methodological quality analysis of the included trials by Jadad scoring

| Ref.                                           | Randomization | Blinding | Withdrawal or drop-outs | Total |
|------------------------------------------------|---------------|----------|-------------------------|-------|
| Campbell JH, et al, 1990 <sup>[26]</sup>       | 2             | 2        | 0                       | 4     |
| Boucinhas JC, et al, 1990 <sup>[27]</sup>      | 0             | 0        | 1                       | 1     |
| Reilly D, et al, 1994 <sup>[28]</sup>          | 1             | 2        | 1                       | 4     |
| Freitas LAS, et al., 1995 <sup>[29]</sup>      | 1             | 2        | 1                       | 4     |
| Matusiewicz R, et al., 1995 <sup>[30]</sup>    | 0             | 1        | 0                       | 1     |
| Matusiewicz R, 1996 <sup>[31]</sup>            | 0             | 1        | 0                       | 1     |
| Lara-Marquez ML, et al, 1997 <sup>[32]</sup>   | 1             | 1        | 0                       | 2     |
| Jansen G, et al, 1997 <sup>[33]</sup>          | 1             | 1        | 0                       | 2     |
| Riveron-Garrote M, et al, 1998 <sup>[34]</sup> | 1             | 1        | 0                       | 2     |
| Matusiewicz R, et al, 1999 <sup>[35]</sup>     | 1             | 1        | 0                       | 2     |
| Lewith G, et al, 2002 <sup>[36]</sup>          | 2             | 2        | 1                       | 5     |
| Suri JC, et al, 2002 <sup>[37]</sup>           | 1             | 1        | 0                       | 2     |
| White A, et al, 2003 <sup>[38]</sup>           | 2             | 2        | 1                       | 5     |
| Delzoppo G, 2004 <sup>[39]</sup>               | 2             | 0        | 0                       | 2     |
| Mayra RG, et al, 2005 <sup>[40]</sup>          | 1             | 0        | 0                       | 1     |
| Thompson EA, et al, 2011 <sup>[41]</sup>       | 1             | 1        | 1                       | 3     |

Table 7: Risk of bias analysis of the included trials by Cochrane Collaboration Tool

| References                                     | Domain I:<br>Random<br>sequence<br>generation | Domain II:<br>Allocation<br>concealment | Domain<br>III:<br>Blinding of<br>participants<br>and<br>personnel | Domain<br>IV:<br>Blinding<br>of<br>outcome<br>assessors | Domain V:<br>Incomplete<br>outcome<br>data | Domain<br>VI:<br>Selective<br>reporting | Domain<br>VII:<br>Anything<br>else | Overall<br>RoB | RoB<br>rating |
|------------------------------------------------|-----------------------------------------------|-----------------------------------------|-------------------------------------------------------------------|---------------------------------------------------------|--------------------------------------------|-----------------------------------------|------------------------------------|----------------|---------------|
| Campbell JH, et al, 1990 <sup>[26]</sup>       | Y                                             | Y                                       | Y                                                                 | U                                                       | U                                          | U                                       | U                                  | Uncertain      | B4            |
| Boucinhas JC, et al, 1990 <sup>[27]</sup>      | N                                             | N                                       | N                                                                 | N                                                       | N                                          | U                                       | U                                  | High           | C5.2          |
| Reilly D, et al, 1994 <sup>[28]</sup>          | Y                                             | Y                                       | Y                                                                 | Y                                                       | N                                          | U                                       | U                                  | High           | C1.2          |
| Freitas LAS, et al., 1995 <sup>[29]</sup>      | Y                                             | Y                                       | Y                                                                 | Y                                                       | N                                          | U                                       | U                                  | High           | C1.2          |
| Matusiewicz R, et al., 1995 <sup>[30]</sup>    | Y                                             | U                                       | Y                                                                 | Y                                                       | U                                          | U                                       | U                                  | Uncertain      | B4            |
| Matusiewicz R, 1996 <sup>[31]</sup>            | N                                             | U                                       | Y                                                                 | U                                                       | U                                          | U                                       | U                                  | High           | C1.5          |
| Lara-Marquez ML, et al, 1997 <sup>[32]</sup>   | Y                                             | Y                                       | Y                                                                 | U                                                       | U                                          | U                                       | U                                  | Uncertain      | B4            |
| Jansen G, et al, 1997 <sup>[33]</sup>          | Y                                             | U                                       | Y                                                                 | U                                                       | U                                          | U                                       | U                                  | Uncertain      | B5            |
| Riveron-Garrote M, et al, 1998 <sup>[34]</sup> | Y                                             | Y                                       | Y                                                                 | U                                                       | Y                                          | U                                       | U                                  | Uncertain      | B3            |
| Matusiewicz R, et al, 1999 <sup>[35]</sup>     | U                                             | U                                       | Y                                                                 | Y                                                       | U                                          | U                                       | U                                  | Uncertain      | B5            |
| Lewith G, et al, 2002 <sup>[36]</sup>          | Y                                             | Y                                       | Y                                                                 | Y                                                       | N                                          | U                                       | U                                  | High           | C1.2          |
| Suri JC, et al, 2002 <sup>[37]</sup>           | Y                                             | Y                                       | Y                                                                 | U                                                       | U                                          | U                                       | U                                  | Uncertain      | B4            |
| White A, et al, 2003 <sup>[38]</sup>           | Y                                             | Y                                       | Y                                                                 | Y                                                       | N                                          | U                                       | U                                  | High           | C1.2          |
| Delzoppo G, 2004 <sup>[39]</sup>               | Y                                             | N                                       | N                                                                 | N                                                       | U                                          | U                                       | U                                  | High           | C3.3          |
| Mayra RG, et al, 2005 <sup>[40]</sup>          | Y                                             | U                                       | U                                                                 | U                                                       | U                                          | U                                       | U                                  | Uncertain      | B6            |
| Thompson EA, et al, 2011 <sup>[41]</sup>       | Y                                             | U                                       | Y                                                                 | N                                                       | N                                          | U                                       | U                                  | High           | C2.3          |

Y: Yes; N: No; U: Uncertain

Table 8: Model validity assessment of the included trials by Mathie's criteria

| References                                     | Domain I:<br>Rationale<br>for the<br>choice of the<br>particular<br>homeopathic<br>intervention | Domain II:<br>Homeopathic<br>principles<br>reflected in<br>the<br>intervention | Domain III:<br>Extent of<br>homeopathic<br>practitioner<br>input | Domain<br>IV:<br>Nature of<br>the main<br>outcome<br>measure | Domain<br>V:<br>Capability<br>of the<br>main<br>outcome<br>measure<br>to detect<br>change | Domain<br>VI:<br>Length of<br>the<br>follow-up<br>to the<br>endpoint<br>of the<br>study | Overall<br>validity | Validity rating |
|------------------------------------------------|-------------------------------------------------------------------------------------------------|--------------------------------------------------------------------------------|------------------------------------------------------------------|--------------------------------------------------------------|-------------------------------------------------------------------------------------------|-----------------------------------------------------------------------------------------|---------------------|-----------------|
| Campbell JH, et al, 1990 <sup>[26]</sup>       | U                                                                                               | N                                                                              | N                                                                | Y                                                            | Y                                                                                         | Y                                                                                       | Inadequate          | C2.1            |
| Boucinhas JC, et al, 1990 <sup>[27]</sup>      | U                                                                                               | N                                                                              | N                                                                | U                                                            | U                                                                                         | Y                                                                                       | Inadequate          | C2.3            |
| Reilly D, et al, 1994 <sup>[28]</sup>          | U                                                                                               | N                                                                              | N                                                                | Y                                                            | Y                                                                                         | Y                                                                                       | Inadequate          | C2.1            |
| Freitas LAS, et al., 1995 <sup>[29]</sup>      | U                                                                                               | N                                                                              | N                                                                | U                                                            | U                                                                                         | Y                                                                                       | Inadequate          | C2.3            |
| Matusiewicz R, et al., 1995 <sup>[30]</sup>    | U                                                                                               | N                                                                              | N                                                                | Y                                                            | Y                                                                                         | Y                                                                                       | Inadequate          | C2.1            |
| Matusiewicz R, 1996 <sup>[31]</sup>            | U                                                                                               | N                                                                              | N                                                                | Y                                                            | Y                                                                                         | Y                                                                                       | Inadequate          | C2.1            |
| Lara-Marquez ML, et al, 1997 <sup>[32]</sup>   | Y                                                                                               | Y                                                                              | U                                                                | Y                                                            | Y                                                                                         | Y                                                                                       | Acceptable          | B1              |
| Jansen G, et al, 1997 <sup>[33]</sup>          | Y                                                                                               | U                                                                              | Y                                                                | Y                                                            | Y                                                                                         | Y                                                                                       | Acceptable          | B1              |
| Riveron-Garrote M, et al, 1998 <sup>[34]</sup> | Y                                                                                               | Y                                                                              | U                                                                | U                                                            | U                                                                                         | Y                                                                                       | Uncertain           | B3              |
| Matusiewicz R, et al, 1999 <sup>[35]</sup>     | U                                                                                               | N                                                                              | N                                                                | U                                                            | U                                                                                         | Y                                                                                       | Inadequate          | C2.3            |
| Lewith G, et al, 2002 <sup>[36]</sup>          | U                                                                                               | N                                                                              | N                                                                | Y                                                            | Y                                                                                         | Y                                                                                       | Inadequate          | C2.1            |
| Suri JC, et al, 2002 <sup>[37]</sup>           | U                                                                                               | N                                                                              | N                                                                | U                                                            | U                                                                                         | Y                                                                                       | Inadequate          | C2.3            |
| White A, et al, 2003 <sup>[38]</sup>           | Y                                                                                               | Y                                                                              | Y                                                                | Y                                                            | Y                                                                                         | Y                                                                                       | Acceptable          | B1              |
| Delzoppo G, 2004 <sup>[39]</sup>               | U                                                                                               | N                                                                              | N                                                                | U                                                            | U                                                                                         | U                                                                                       | Inadequate          | C2.4            |
| Mayra RG, et al, 2005 <sup>[40]</sup>          | U                                                                                               | N                                                                              | N                                                                | Y                                                            | Y                                                                                         | Y                                                                                       | Inadequate          | C2.1            |
| Thompson EA, et al, 2011 <sup>[41]</sup>       | Y                                                                                               | Y                                                                              | Y                                                                | U                                                            | U                                                                                         | Y                                                                                       | Uncertain           | B3              |

Y: Yes; N: No; U: Uncertain

Table 9: Quality of individualization assessment of the included trials by Saha's criteria

| References                                     | Criterion I:<br>Single<br>medicine<br>prescription<br>when<br>required on<br>each<br>occasion | Criterion II:<br>Medicine<br>individualisation | Criterion III:<br>Proper<br>description of<br>approach to<br>medicine<br>individualisation | Criterion IV:<br>Dose<br>individualisation | Criterion V:<br>Proper<br>description of<br>approach to<br>dose<br>individualisation | Criterion<br>VI:<br>Subsequent<br>prescriptions<br>as per<br>Kent's<br>observations<br>and/or<br>Hering's<br>law | Score |
|------------------------------------------------|-----------------------------------------------------------------------------------------------|------------------------------------------------|--------------------------------------------------------------------------------------------|--------------------------------------------|--------------------------------------------------------------------------------------|------------------------------------------------------------------------------------------------------------------|-------|
| Campbell JH, et al, 1990 <sup>[26]</sup>       | Y                                                                                             | N                                              | N                                                                                          | N                                          | N                                                                                    | N                                                                                                                | 1     |
| Boucinhas JC, et al, 1990 <sup>[27]</sup>      | Y                                                                                             | N                                              | N                                                                                          | N                                          | N                                                                                    | N                                                                                                                | 1     |
| Reilly D, et al, 1994 <sup>[28]</sup>          | Y                                                                                             | N                                              | N                                                                                          | N                                          | N                                                                                    | N                                                                                                                | 1     |
| Freitas LAS, et al., 1995 <sup>[29]</sup>      | Y                                                                                             | N                                              | N                                                                                          | N                                          | N                                                                                    | N                                                                                                                | 1     |
| Matusiewicz R, et al., 1995 <sup>[30]</sup>    | N                                                                                             | N                                              | N                                                                                          | N                                          | N                                                                                    | N                                                                                                                | 0     |
| Matusiewicz R, 1996 <sup>[31]</sup>            | N                                                                                             | N                                              | N                                                                                          | N                                          | N                                                                                    | N                                                                                                                | 0     |
| Lara-Marquez ML, et al, 1997 <sup>[32]</sup>   | Y                                                                                             | Y                                              | U                                                                                          | Y                                          | U                                                                                    | U                                                                                                                | 3     |
| Jansen G, et al, 1997 <sup>[33]</sup>          | Y                                                                                             | Y                                              | U                                                                                          | N                                          | N                                                                                    | U                                                                                                                | 2     |
| Riveron-Garrote M, et al, 1998 <sup>[34]</sup> | Y                                                                                             | Y                                              | U                                                                                          | Y                                          | U                                                                                    | U                                                                                                                | 3     |
| Matusiewicz R, et al, 1999 <sup>[35]</sup>     | N                                                                                             | N                                              | N                                                                                          | N                                          | N                                                                                    | N                                                                                                                | 0     |
| Lewith G, et al, 2002 <sup>[36]</sup>          | Y                                                                                             | N                                              | N                                                                                          | N                                          | N                                                                                    | N                                                                                                                | 1     |
| Suri JC, et al, 2002 <sup>[37]</sup>           | N                                                                                             | N                                              | N                                                                                          | N                                          | N                                                                                    | N                                                                                                                | 0     |
| White A, et al, 2003 <sup>[38]</sup>           | Y                                                                                             | Y                                              | U                                                                                          | Y                                          | U                                                                                    | U                                                                                                                | 3     |
| Delzoppo G, 2004 <sup>[39]</sup>               | N                                                                                             | N                                              | N                                                                                          | N                                          | N                                                                                    | N                                                                                                                | 0     |
| Mayra RG, et al, 2005 <sup>[40]</sup>          | N                                                                                             | N                                              | N                                                                                          | N                                          | N                                                                                    | N                                                                                                                | 0     |

|                                          |   |   |   |   |   |   |   |
|------------------------------------------|---|---|---|---|---|---|---|
| Thompson EA, et al, 2011 <sup>[41]</sup> | Y | Y | U | Y | U | U | 3 |
|------------------------------------------|---|---|---|---|---|---|---|

Y: Yes; N: No; U: Uncertain

Table 10: Risk of bias analysis of the excluded observational studies by Cochrane Collaboration Tool

| References                                  | Domain I:<br>Confounding | Domain II:<br>Selection<br>of<br>participants<br>into the<br>study | Domain III:<br>Measurement<br>of<br>interventions | Domain IV:<br>Departures<br>from<br>intended<br>interventions | Domain V:<br>Accounting<br>for missing<br>data | Domain VI:<br>Measurement<br>of outcomes | Domain<br>VII:<br>Selection<br>of<br>reported<br>results | Overall<br>RoB | RoB<br>rating |
|---------------------------------------------|--------------------------|--------------------------------------------------------------------|---------------------------------------------------|---------------------------------------------------------------|------------------------------------------------|------------------------------------------|----------------------------------------------------------|----------------|---------------|
| Anil RB, et al, 1982 <sup>[42]</sup>        | Y                        | U                                                                  | U                                                 | N                                                             | N                                              | N                                        | U                                                        | High           | C3.3          |
| Anil RB, et al, 1988 <sup>[43]</sup>        | Y                        | U                                                                  | U                                                 | N                                                             | N                                              | N                                        | U                                                        | High           | C3.3          |
| Sachdeva OP, et al, 1988 <sup>[44]</sup>    | Y                        | U                                                                  | U                                                 | N                                                             | N                                              | N                                        | U                                                        | High           | C3.3          |
| Mosquera PMF, 1990 <sup>[45]</sup>          | Y                        | U                                                                  | Y                                                 | N                                                             | N                                              | N                                        | U                                                        | High           | C3.2          |
| Castellsagu API, 1992 <sup>[46]</sup>       | Y                        | U                                                                  | Y                                                 | N                                                             | N                                              | N                                        | U                                                        | High           | C3.2          |
| Singh H, 1992 <sup>[47]</sup>               | Y                        | Y                                                                  | Y                                                 | N                                                             | N                                              | N                                        | U                                                        | High           | C3.1          |
| Eizayaga and Eizayaga, 1996 <sup>[48]</sup> | Y                        | Y                                                                  | Y                                                 | N                                                             | N                                              | N                                        | U                                                        | High           | C3.1          |
| Sharma SR, 1999 <sup>[49]</sup>             | Y                        | U                                                                  | Y                                                 | N                                                             | N                                              | N                                        | U                                                        | High           | C3.2          |
| Li AM, et al, 2003 <sup>[50]</sup>          | Y                        | Y                                                                  | Y                                                 | N                                                             | N                                              | Y                                        | U                                                        | High           | C1.1          |
| Vichitra AK, et al, 2008 <sup>[51]</sup>    | Y                        | Y                                                                  | Y                                                 | N                                                             | N                                              | Y                                        | U                                                        | High           | C2.1          |
| Pinto S, 2012 <sup>[52]</sup>               | Y                        | U                                                                  | Y                                                 | N                                                             | N                                              | Y                                        | U                                                        | High           | C2.2          |
| Shafei HF, 2012 <sup>[53]</sup>             | Y                        | Y                                                                  | Y                                                 | N                                                             | N                                              | Y                                        | U                                                        | High           | C2.1          |

Y: Yes; N: No; U: Uncertain

Table 11: Model validity assessment of the excluded studies by Mathie's criteria

| References                                  | Domain I:<br>Rationale<br>for the<br>choice of the<br>particular<br>homeopathic<br>intervention | Domain II:<br>Homeopathic<br>principles<br>reflected in<br>the<br>intervention | Domain III:<br>Extent of<br>homeopathic<br>practitioner<br>input | Domain<br>IV:<br>Nature of<br>the main<br>outcome<br>measure | Domain<br>V:<br>Capability<br>of the<br>main<br>outcome<br>measure<br>to detect<br>change | Domain<br>VI:<br>Length of<br>the<br>follow-up<br>to the<br>endpoint<br>of the<br>study | Overall<br>validity | Validity rating |
|---------------------------------------------|-------------------------------------------------------------------------------------------------|--------------------------------------------------------------------------------|------------------------------------------------------------------|--------------------------------------------------------------|-------------------------------------------------------------------------------------------|-----------------------------------------------------------------------------------------|---------------------|-----------------|
| Anil RB, et al, 1982 <sup>[42]</sup>        | Y                                                                                               | U                                                                              | Y                                                                | N                                                            | N                                                                                         | Y                                                                                       | Inadequate          | C2.1            |
| Anil RB, et al, 1988 <sup>[43]</sup>        | Y                                                                                               | U                                                                              | Y                                                                | N                                                            | N                                                                                         | Y                                                                                       | Inadequate          | C2.1            |
| Sachdeva OP, et al, 1988 <sup>[44]</sup>    | Y                                                                                               | U                                                                              | Y                                                                | N                                                            | N                                                                                         | Y                                                                                       | Inadequate          | C2.1            |
| Mosquera PMF, 1990 <sup>[45]</sup>          | Y                                                                                               | Y                                                                              | Y                                                                | N                                                            | N                                                                                         | Y                                                                                       | Inadequate          | C2              |
| Castellsagu API, 1992 <sup>[46]</sup>       | Y                                                                                               | Y                                                                              | Y                                                                | N                                                            | N                                                                                         | Y                                                                                       | Inadequate          | C2              |
| Singh H, 1992 <sup>[47]</sup>               | Y                                                                                               | Y                                                                              | Y                                                                | N                                                            | N                                                                                         | Y                                                                                       | Inadequate          | C2              |
| Eizayaga and Eizayaga, 1996 <sup>[48]</sup> | Y                                                                                               | Y                                                                              | Y                                                                | N                                                            | N                                                                                         | Y                                                                                       | Inadequate          | C2              |
| Sharma SR, 1999 <sup>[49]</sup>             | Y                                                                                               | Y                                                                              | Y                                                                | N                                                            | N                                                                                         | Y                                                                                       | Inadequate          | C2              |
| Li AM, et al, 2003 <sup>[50]</sup>          | U                                                                                               | N                                                                              | N                                                                | Y                                                            | Y                                                                                         | Y                                                                                       | Inadequate          | C2.1            |
| Vichitra AK, et al, 2008 <sup>[51]</sup>    | Y                                                                                               | Y                                                                              | Y                                                                | N                                                            | N                                                                                         | Y                                                                                       | Inadequate          | C2              |
| Pinto S, 2012 <sup>[52]</sup>               | Y                                                                                               | Y                                                                              | Y                                                                | Y                                                            | Y                                                                                         | Y                                                                                       | Acceptable          | A               |
| Shafei HF, 2012 <sup>[53]</sup>             | Y                                                                                               | Y                                                                              | Y                                                                | Y                                                            | Y                                                                                         | Y                                                                                       | Acceptable          | A               |

Y: Yes; N: No; U: Uncertain

Table 12: Quality of individualization assessment of the excluded trials by Saha's criteria

| References                                  | Criterion I:<br>Single<br>medicine<br>prescription<br>when<br>required on<br>each<br>occasion | Criterion II:<br>Medicine<br>individualisation | Criterion III:<br>Proper<br>description of<br>approach to<br>medicine<br>individualisation | Criterion IV:<br>Dose<br>individualisation | Criterion V:<br>Proper<br>description of<br>approach to<br>dose<br>individualisation | Criterion<br>VI:<br>Subsequent<br>prescriptions<br>as per<br>Kent's<br>observations<br>and/or<br>Hering's<br>law | Score |
|---------------------------------------------|-----------------------------------------------------------------------------------------------|------------------------------------------------|--------------------------------------------------------------------------------------------|--------------------------------------------|--------------------------------------------------------------------------------------|------------------------------------------------------------------------------------------------------------------|-------|
| Anil RB, et al, 1982 <sup>[42]</sup>        | Y                                                                                             | U                                              | U                                                                                          | Y                                          | U                                                                                    | U                                                                                                                | 2     |
| Anil RB, et al, 1988 <sup>[43]</sup>        | Y                                                                                             | U                                              | U                                                                                          | Y                                          | U                                                                                    | U                                                                                                                | 2     |
| Sachdeva OP, et al, 1988 <sup>[44]</sup>    | Y                                                                                             | U                                              | U                                                                                          | Y                                          | U                                                                                    | U                                                                                                                | 2     |
| Mosquera PMF, 1990 <sup>[45]</sup>          | Y                                                                                             | Y                                              | Y                                                                                          | Y                                          | U                                                                                    | U                                                                                                                | 4     |
| Castellsagu API, 1992 <sup>[46]</sup>       | Y                                                                                             | Y                                              | Y                                                                                          | Y                                          | U                                                                                    | U                                                                                                                | 4     |
| Singh H, 1992 <sup>[47]</sup>               | Y                                                                                             | Y                                              | U                                                                                          | Y                                          | U                                                                                    | U                                                                                                                | 3     |
| Eizayaga and Eizayaga, 1996 <sup>[48]</sup> | Y                                                                                             | Y                                              | Y                                                                                          | Y                                          | U                                                                                    | U                                                                                                                | 4     |
| Sharma SR, 1999 <sup>[49]</sup>             | Y                                                                                             | Y                                              | U                                                                                          | Y                                          | U                                                                                    | U                                                                                                                | 3     |
| Li AM, et al, 2003 <sup>[50]</sup>          | Y                                                                                             | N                                              | N                                                                                          | N                                          | N                                                                                    | N                                                                                                                | 1     |
| Vichitra AK, et al, 2008 <sup>[51]</sup>    | Y                                                                                             | Y                                              | Y                                                                                          | Y                                          | U                                                                                    | U                                                                                                                | 4     |
| Pinto S, 2012 <sup>[52]</sup>               | Y                                                                                             | Y                                              | U                                                                                          | Y                                          | U                                                                                    | U                                                                                                                | 3     |
| Shafei HF, 2012 <sup>[53]</sup>             | Y                                                                                             | Y                                              | Y                                                                                          | Y                                          | U                                                                                    | U                                                                                                                | 4     |

Y: Yes; N: No; U: Uncertain
